# Supplementary material
Source: PubMed Central journal article supplement (PMC2722226)
Supplement: ddn411_1.pdf [file ddn411_1.pdf]

## Supplementary Data

Supplementary Table 1S - Cardiovascular Malformations in Study Group\*

| <b>CVM</b>                                      | <b>Count</b> | <b>Percent</b> |
|-------------------------------------------------|--------------|----------------|
| ASD                                             | 84           | 31.2%          |
| VSD                                             | 116          | 43.1%          |
| Atrioventricular Canal Septal Defects           | 50           | 18.6%          |
| Dextrocardia/Mesocardia                         | 75           | 27.9%          |
| Double Inlet LV                                 | 19           | 7.1%           |
| Double Outlet RV                                | 62           | 23.1%          |
| d-TGA                                           | 95           | 35.3%          |
| l-TGA                                           | 52           | 19.1%          |
| PAPVR                                           | 17           | 6.1%           |
| TAPVR                                           | 34           | 12.6%          |
| Pulmonary Atresia                               | 53           | 19.7%          |
| Pulmonic Stenosis                               | 97           | 36.1%          |
| Hypoplastic Left Heart/Left Obstructive Defects | 64           | 23.8%          |
| Interrupted IVC                                 | 47           | 17.5%          |
| Persistent Left SVC                             | 52           | 19.3%          |

\*malformations are counted independently and more than one malformation typically was found in each subject.

ASD, atrial septal defect; d-TGA, dextro-transposition of the great arteries; IVC, inferior vena cava; l-TGA, levo-transposition of the great arteries; LV, left ventricle; PAPVR, partial anomalous pulmonary venous return; RV, right ventricle; SVC, superior vena cava; TAPVR, total anomalous pulmonary venous return.

Supplementary Table 2S - Synonymous nucleotide substitutions and common variants detected in affected cases

| <b>Amplicon</b> | <b>Nucleotide</b> | <b>Amino acid</b> | <b>Affecteds</b> | <b>Controls</b> |
|-----------------|-------------------|-------------------|------------------|-----------------|
| 2b              | c.494G>A          | R165H             | 165/269          | ND              |
| 2c              | c.588C>G          | L196L             | 2/269            | 0/298           |
| 2c              | c.612G>A          | Q204Q             | 1/269            | 0/298           |
| 3               | c.924C>T          | V308V             | 1/269            | ND              |

ND, not determined

Supplementary Table 3S - Primer pairs and PCR Conditions for Amplification of Human *NODAL*

| <b>Exon</b> | <b>5' Primer</b>        | <b>3' Primer</b>        | <b>Product size (BP)</b> | <b>A.T.</b> | <b>Additional reagents</b> |
|-------------|-------------------------|-------------------------|--------------------------|-------------|----------------------------|
| 1           | CAGGATATAAGGGCTGGA      | ACAGCACTTCCCGAGTCC      | 325                      | 53 °C       | BETAINE                    |
| 2A          | GAGCTATGGTGGTTGTGACT    | GAAAAGGTGACCTGGGACAA    | 329                      | 53 °C       | NONE                       |
| 2B          | CTTGCCATTGAGATTTCCA     | CGAGAGGTTGGAGTAGAGCATAA | 235                      | 51 °C       | NONE                       |
| 2C          | ATGGTTTTGGAGGTGACCAG    | CCATCCGATCAGGTTGAAGT    | 333                      | 56 °C       | NONE                       |
| 2D          | CAACTGTGTCGGAAGGTCAA    | CCTGGTACATTGGAGGTGCT    | 285                      | 60 °C       | NONE                       |
| 3           | TTGCACTCAGGAAGTACTTTAAC | TCATGTCTTCCAGGAGTTCC    | 332                      | 52 °C       | BETAINE                    |

A.T., recommended annealing temperature

Supplementary Table 4S - Primers for site-directed mutagenesis of NODAL

| <b>Mutation</b> | <b>cDNA change</b> | <b>Primers</b>                                                                                                 |
|-----------------|--------------------|----------------------------------------------------------------------------------------------------------------|
| E203K           | 607A>G             | 5' CTCCAACCTCTCGCAG <b>A</b> AGCAGAGGCAGCTGGG3'<br>5' CCCAGCTGCCTCTGCT <b>T</b> CTGCGAGAGGTTGGAG3'             |
| G260R           | 778G>A             | 5' GACTTCAACCTGATC <b>A</b> AGATGGGGCTCCTGGAT3'<br>5' ATCCAGGAGCCCCATC <b>T</b> GATCAGGTTGAAGTC3'              |
| R275C           | 823C>T             | 5' GCAGTACAACGCCTAT <b>T</b> GCTGTGAGGGCGAGTG3'<br>5' CACTCGCCCTCACAGC <b>A</b> AATAGGCGTTGTACTGC3'            |
| V284F           | 850G>T             | 5' GCGAGTGTCTAATCCT <b>T</b> TTGGGGAGGAGTTTCATCC3'<br>5' GGATGAAACTCCTCCCC <b>A</b> AAGGATTAGGACACTCGC3'       |
| 24bp Del        | 700-723            | 5' GGGAGTGGGGCAAGGACAGAAGTCAACTGT3'<br>5' ACAGTTGACTTCTGTCCTTGCCCCACTCCC5'                                     |
| 9bp Ins         | 700-708            | 5' GGGAGTGGGGCAAG <b>TTGACTTCC</b> GACAGAAGTCAACTGT3'<br>5' ACAGTTGACTTCTGTC <b>GGAAGTCAA</b> CTTGCCCCACTCCC3' |

Bold typeset indicates alterations introduced via site directed mutagenesis
